# Supplementary figures and images for: Isolation of Osteoblastic Differentiation-Inducing Constituents from Peanut Sprouts and Development of Optimal Extraction Method
Source: MDPI journal article supplement (doi:10.3390/separations10080435), 2023-08-01

Supplementary Figure S1

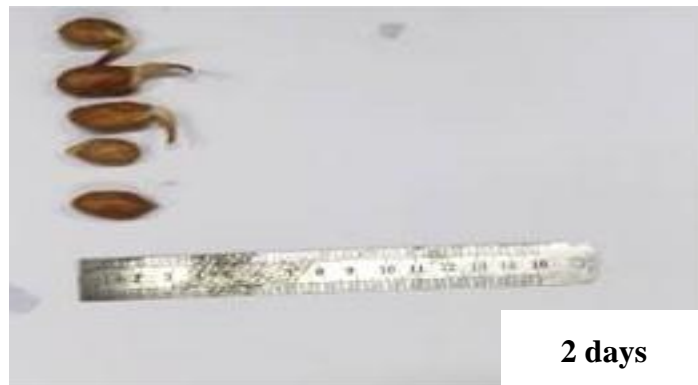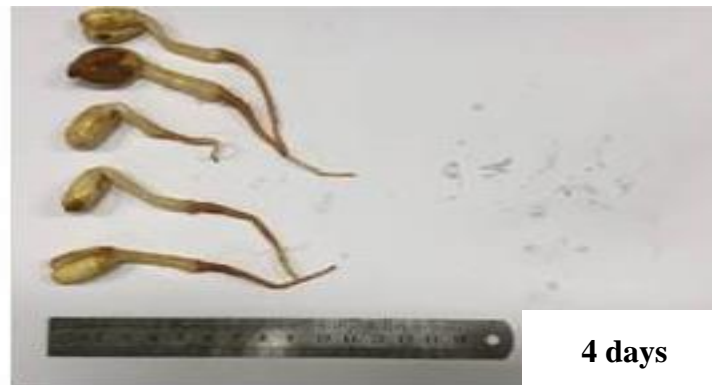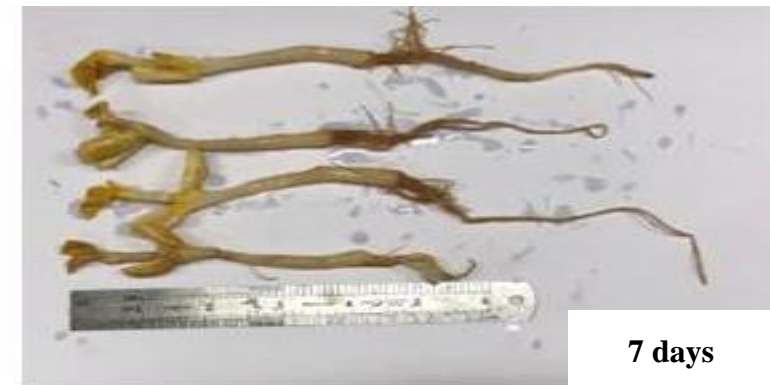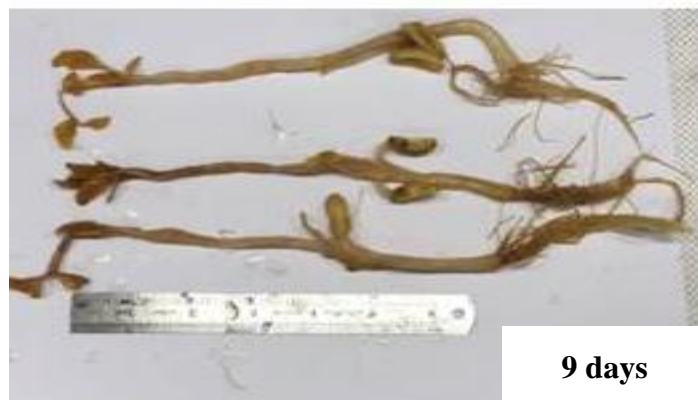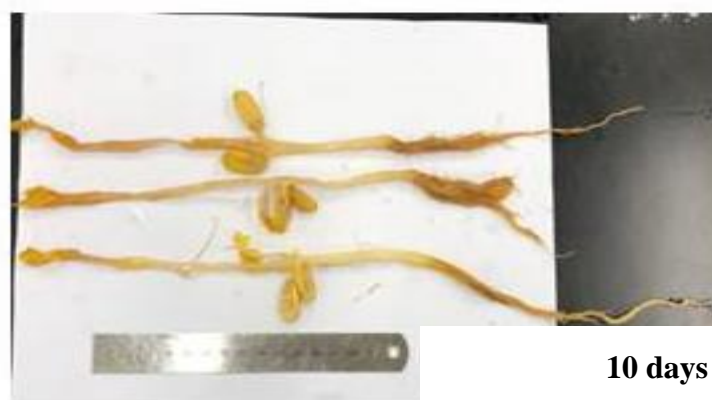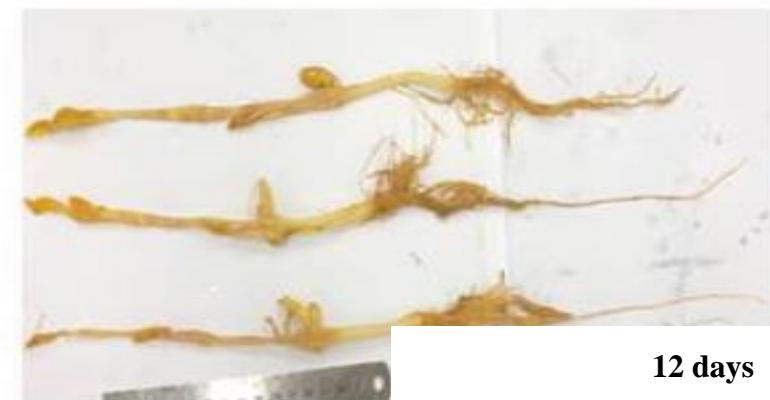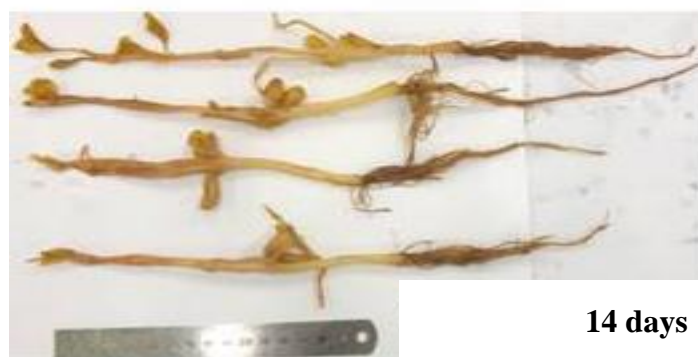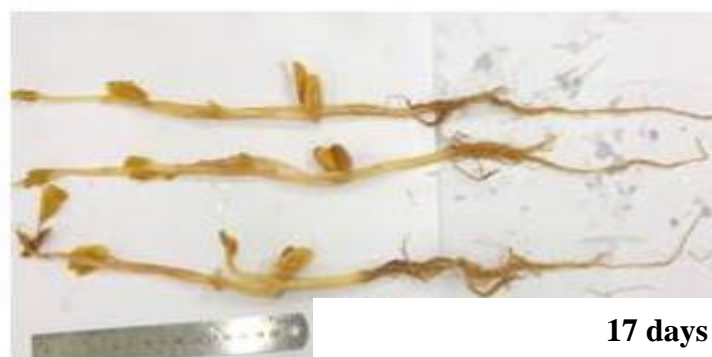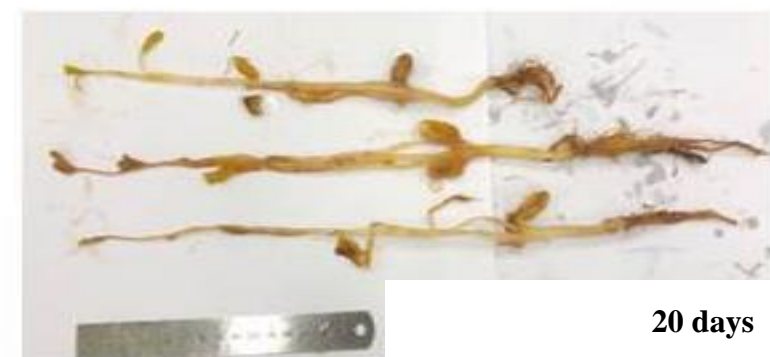

Supplementary Figure S2

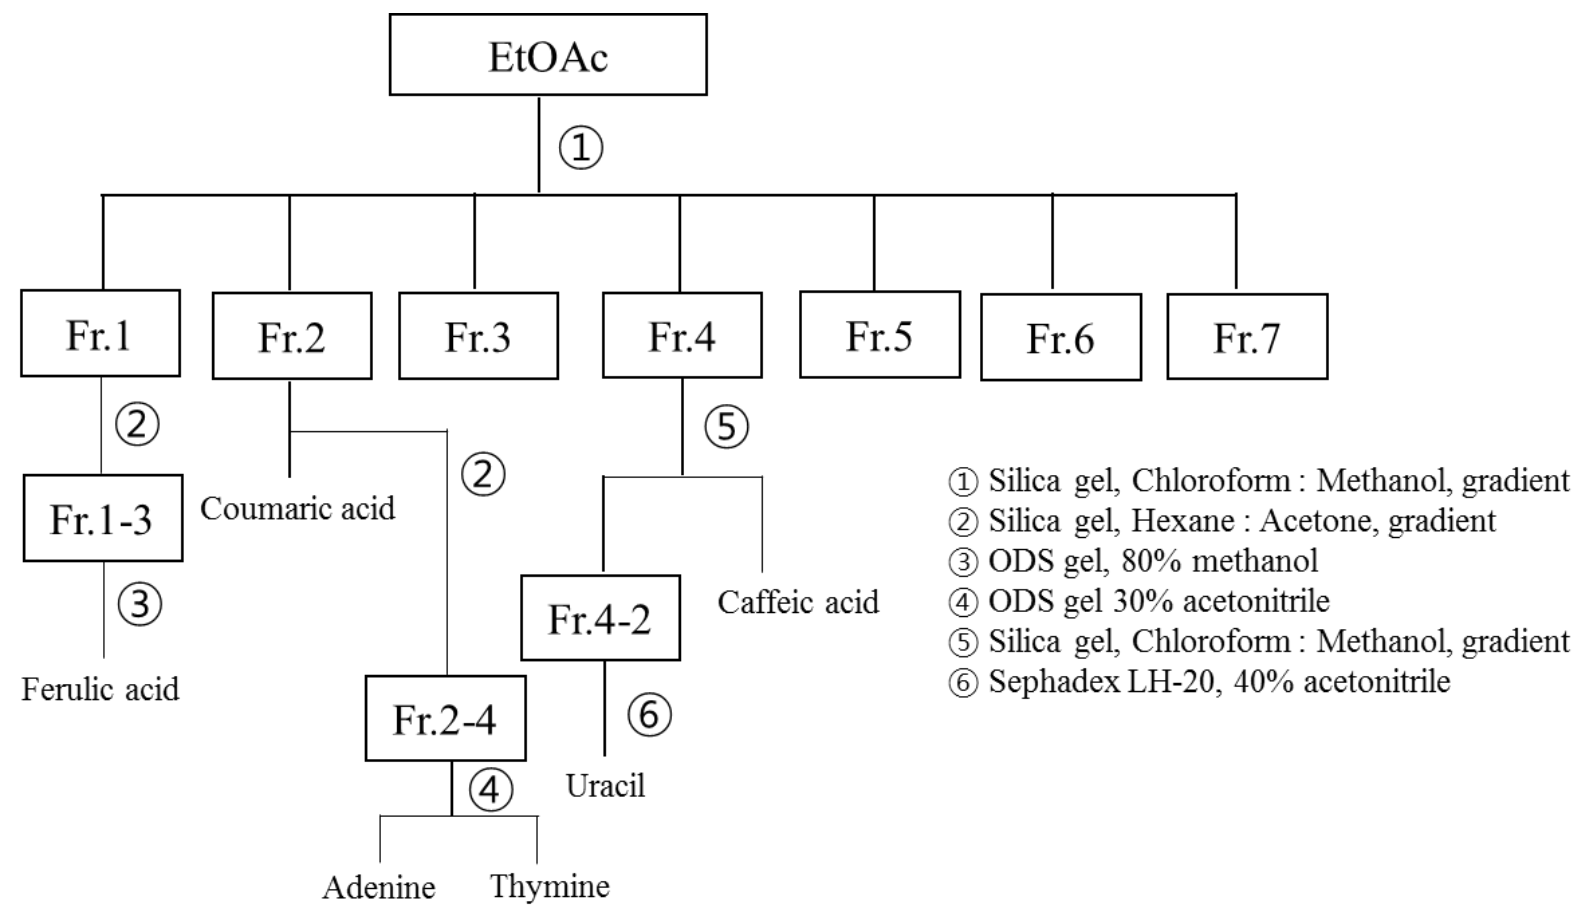

Supplement: s1 [file s1]
